# Supplementary material for: Space-confinement-induced synthesis of hierarchically nanoporous carbon nanowires for the enhanced electrochemical reduction of oxygen
Source: Royal Society of Chemistry journal article supplement (doi:10.1039/c4ta07106a), 2015-01-01
Supplement: c4ta07106a1.pdf [file c4ta07106a1.pdf]

## Electronic Supplementary Information for Space-Confinement-Induced Synthesis of Hierarchically Nanoporous Carbon Nanowire for the Enhanced Electrochemical Reduction of Oxygen

Jiaoxing Xu,<sup>a,b</sup> Qiangmin Yu,<sup>a,b</sup> Lunhui Guan<sup>a,b\*</sup>

<sup>a</sup> Key Laboratory of Design and Assembly of Functional Nanostructures, Fujian Institute of Research on the Structure of Matter, Chinese Academy of Sciences, Fuzhou 350002, China. Tel./Fax: 86-591-63173539. E-mail: guanlh@fjirsm.ac.cn.

<sup>b</sup> Fujian provincial key laboratory of nanomaterials, Fuzhou, Fujian 350002, China

### 1. Details of experimental

The bimetallic oxide filled in the AAO channels was prepared through a vacuum-impregnation and oxidative decomposition. In brief, the AAO membrane with a diameter of 25 mm and channel size of 100 nm was first vacuum submerged in the nitrate aqueous solution (1.0 mL, 0.3 mol·L<sup>-1</sup>, Fe/Co=1:2) at room temperature. The vacuum condition was kept until the water was completely evaporated. Then, another 1 mL distilled water was added to dissolve the residual metal nitrate and again vacuum-soaking. This procedure repeated for three times. After that, the AAO template with metal nitrate-bearing was heated at 500 °C in air for 2 hours to transform into bimetallic oxide-bearing AAO template according to literature.<sup>1</sup> In the supporting experimental, the AAO channel beard with trace Fe/Co metal oxide was prepared for one-time vacuum impregnation and then for the same oxidative decomposition.

### 2. Additional experimental data

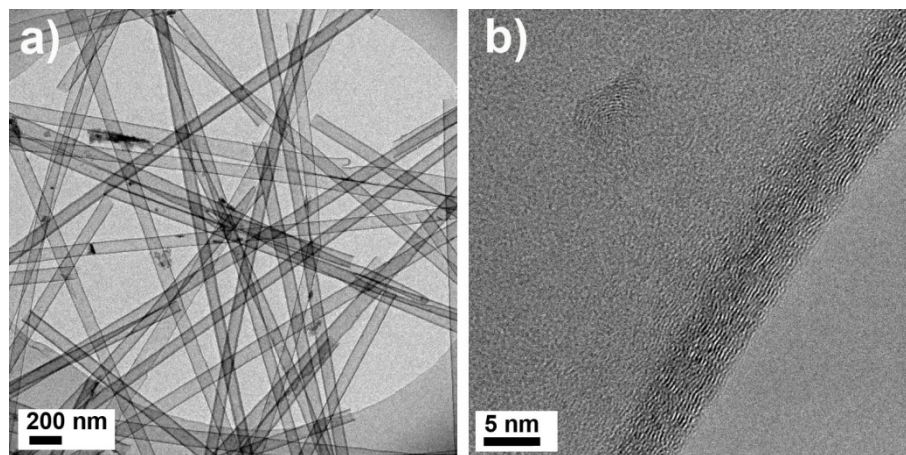

Fig. S1. (a)TEM and (b) HR-TEM image of N-CT sample.

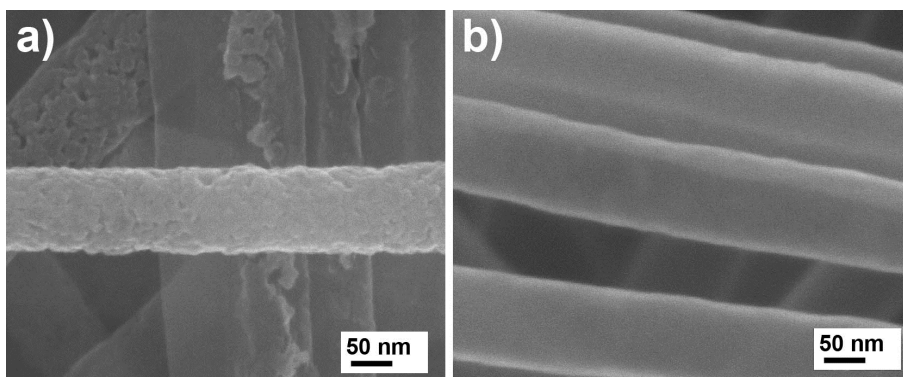

**Fig. S2.** SEM images of N-CW synthesized by using AAO channel beard with traces of metal oxide (a) and N-CT sample (b).

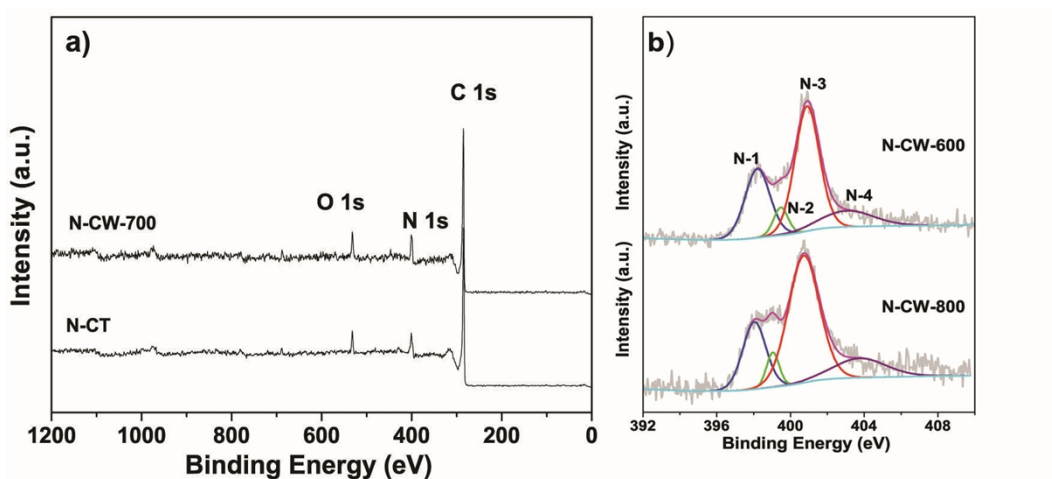

**Fig. S3.** (a) XP survey spectra of N-CW-700 and N-CT samples and (b) High-resolution N 1s spectra of N-CW-600 and N-CW-800.

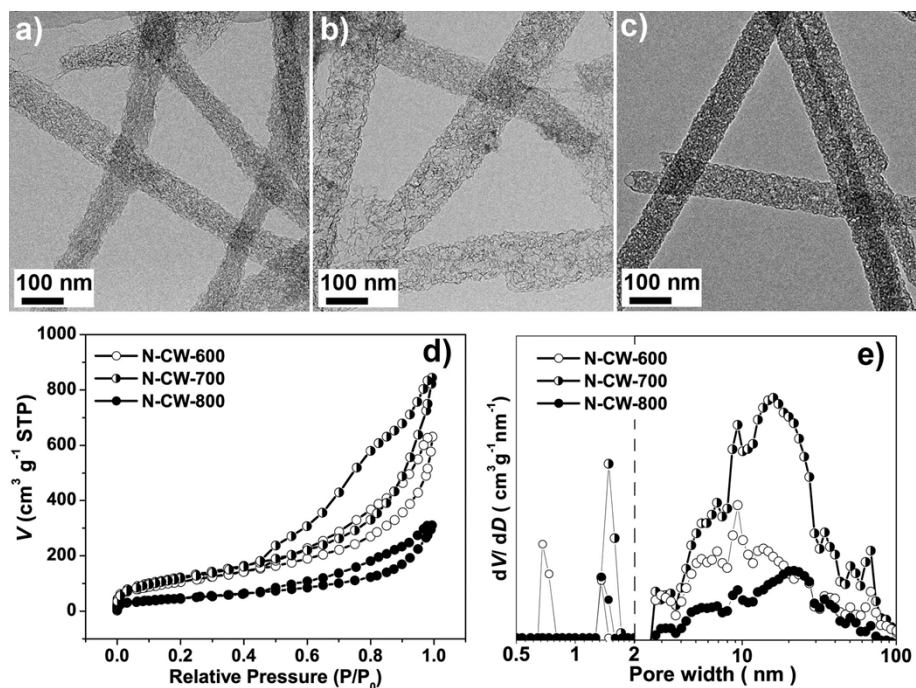

Fig. S4 (a-c) TEM image of the N-CW-600, N-CW-700 and N-CW-800 samples, (e) The corresponding  $N_2$  sorption isotherms and (f) pore size distribution (PSD) calculated from nonlocal density functional theory (NLDFT) method.

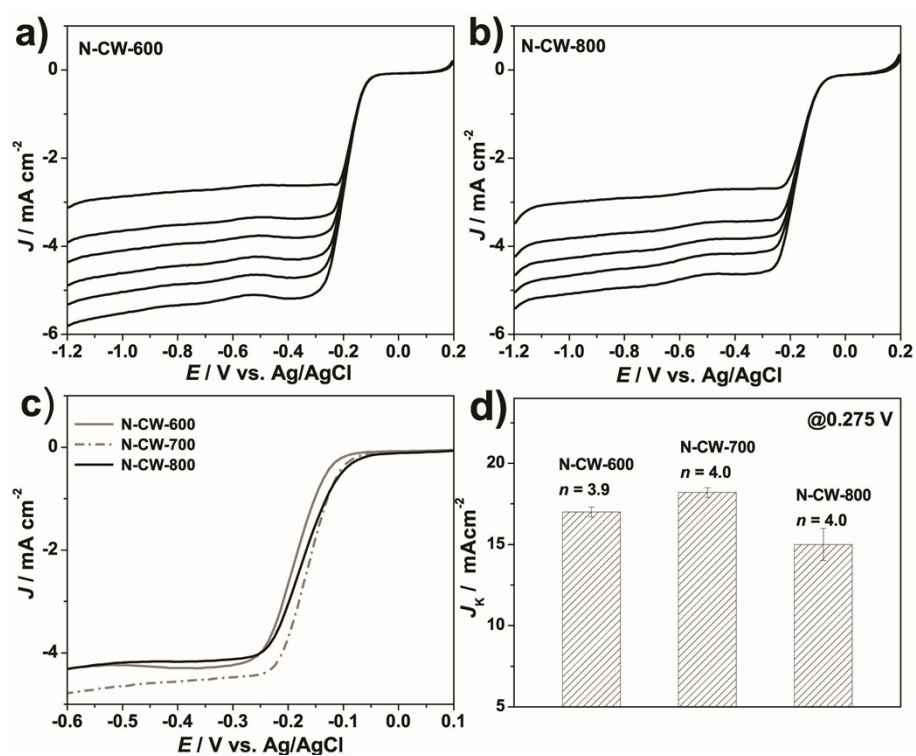

Fig. S5. (a,b) LSV curves of the N-CW-600 and N-CW-800 samples in 0.1 M NaOH alkaline media; (c) LSV curves of the N-CW-600, N-CW-700 and N-CW-800 samples at scan rate of 1600 rpm; (d) Electrochemical activity given for the kinetically limited current density ( $J_k$ ) and the corresponding electron transfer number ( $n$ ) of different samples at  $-0.275$  V.

**Table S1.** Physicochemical properties and the electrocatalytic activity of the N-CT and N-CWs samples for ORR in comparison with the commercial Pt/C catalyst.

| Catalysts | SA <sup>a)</sup>                   | PV <sup>b)</sup>                    | PSD <sup>c)</sup> | At% <sup>d)</sup> N |                   |                   |                   | $E_{1/2}$ <sup>i)</sup> | $J_k$ <sup>j)</sup>    | $n$ <sup>k)</sup> |
|-----------|------------------------------------|-------------------------------------|-------------------|---------------------|-------------------|-------------------|-------------------|-------------------------|------------------------|-------------------|
|           | [m <sup>2</sup> ·g <sup>-1</sup> ] | [cm <sup>3</sup> ·g <sup>-1</sup> ] | [nm]              | N-1 <sup>e)</sup>   | N-2 <sup>f)</sup> | N-3 <sup>g)</sup> | N-4 <sup>h)</sup> | [mV]                    | [mA·cm <sup>-2</sup> ] |                   |
| N-CT      | 109                                | 0.91                                | 65                | 2.5                 | 0.4               | 6.1               | 1.6               | -220                    | 11.5                   | 3.65              |
| N-CW-600  | 396                                | 0.98                                | 0.7/1.4/10        | 2.8                 | 0.7               | 4.9               | 1.4               | -185                    | 17                     | 3.9               |
| N-CW-700  | 455                                | 1.30                                | 1.5/15            | 3.2                 | 0.4               | 6.3               | 2.1               | -160                    | 18.2                   | 4.0               |
| N-CW-800  | 176                                | 0.48                                | 1.4/22            | 1.6                 | 0.5               | 4.0               | 1.0               | -175                    | 15.3                   | 4.0               |
| Pt/C      | --                                 | --                                  | --                | --                  | --                | --                | --                | -155                    | 23.1                   | 4.0               |

<sup>a)</sup> Specific surface area from multiple BET method; <sup>b)</sup> Total pore volume at  $P/P_0 = 0.99$ ; <sup>c)</sup> Pore size distribution, estimated using the nonlocal density functional theory for N-CWs (assuming slit pore geometry) and the Barrett–Joyner–Halenda formula for N-CT (cylindrical pore geometry); <sup>d)</sup> Atomic ratio data from XPS analyses; <sup>e)</sup> Pyridinic-N, at ~398.2 eV; <sup>f)</sup> Amino-N, at ~399.3 eV; <sup>g)</sup> Pyrrolic-/graphitic-N, at ~400.5-~402 eV; <sup>h)</sup> Oxidized-N, at ~402-405 eV; <sup>i)</sup> Half-wave potential ( $E_{1/2}$ ), estimated from LSV curves; <sup>j)</sup> Limited kinetic current density at -0.275 V. <sup>k)</sup> The corresponding electron-transfer number.

**Table S2.** ICP analysis of the residual of Fe/Co metals in typical N-CW-700 sample.

| Sample   | Fe / wt.% | Co / wt.% | Al / wt.% |
|----------|-----------|-----------|-----------|
| N-CW-700 | 0.38      | 0.33      | 0.12      |

### 3. Koutechy-Levich equations and the transfer electron number calculations

The transfer electron number per oxygen molecule involved in the oxygen reduction at N-CW and N-CT electrodes was determined on the basis of the Koutechy-Levich equation<sup>2,3</sup> given below:

$$\frac{1}{J} = \frac{1}{J_L} + \frac{1}{J_K} = \frac{1}{B\omega^{1/2}} + \frac{1}{J_K} \quad (1)$$

$$B = 0.62nFC_0(D_0)^{2/3}\nu^{-1/6} \quad (2)$$

$$J_K = nF\kappa C_0 \quad (3)$$

where  $J_K$  is the kinetics current density,  $J$  is the measured current density of the ORR,  $n$  represents the number of electrons transferred per oxygen molecule,  $F$  is the Faraday constant ( $F = 96485 \text{ C}\cdot\text{mol}^{-1}$ ),  $C_0$  is the bulk concentration of  $\text{O}_2$  ( $= 1.2 \times 10^{-3} \text{ mol}\cdot\text{L}^{-1}$ ),  $D_0$  is the diffusion coefficient of  $\text{O}_2$  in the NaOH electrolyte ( $= 1.9 \times 10^{-5} \text{ cm}^2 \text{ S}^{-1}$ ),  $\nu$  is the kinetic viscosity of the electrolyte ( $= 0.01 \text{ cm}^2 \text{ S}^{-1}$ ),  $\kappa$  is the electron-transfer rate constant and  $\omega$  is the angular

velocity of the the disk (  $\omega = 2\pi N$ ,  $N$  is the linear rotation speed ). According to Eqs. (1) and (2), the number of electrons transferred ( $n$ ) and  $J_K$  can be obtained from the slope and intercept of the K-L plots, respectively.

## Reference

1. H. Chen, Y. Yang, Z. Hu, K. F. Huo, Y. W. Ma, Y. Chen, X. S. Wang and Y. N. Lu, *J Phys Chem B*, 2006, **110**, 16422-16427.
2. W. Chen, S. W. Chen, *Angew Chem Int Ed*, 2009, **48**, 4386-4389.
3. J. X. Xu, G. F. Dong, C. H. Jin, M. H. Huang, L. H. Guan, *ChemSusChem*, 2013, **6**, 493-499.
